# Supplementary material for: Loop-Mediated Isothermal Amplification (LAMP) Assay for Detecting Burkholderia cepacia Complex in Non-Sterile Pharmaceutical Products
Source: MDPI journal article supplement (doi:10.3390/pathogens10091071), 2021-08-24

## Supplementary Material

Table S1. Specificity analysis of LAMP for BCC.

|                          | No | Strain name                                                     | Primers |         |         |
|--------------------------|----|-----------------------------------------------------------------|---------|---------|---------|
|                          |    |                                                                 | RibB 5  | RibB 16 | RibB 67 |
| Non- <i>Burkholderia</i> | 1  | <i>Enterococcus faecalis</i> ATCC 29212                         | -       | -       | -       |
|                          | 2  | <i>Enterococcus durans</i> ATCC 6056                            | -       | -       | -       |
|                          | 3  | <i>Proteus mirabilis</i> ATCC 7002                              | -       | -       | -       |
|                          | 4  | <i>Enterococcus faecium</i> ATCC 35667                          | -       | -       | -       |
|                          | 5  | <i>Bacillus subtilis</i> ATCC 6051                              | -       | -       | -       |
|                          | 6  | <i>Citrobacter freundii</i> ATCC 8090                           | -       | -       | -       |
|                          | 7  | <i>Pseudomonas aeruginosa</i> PAO1                              | -       | -       | -       |
|                          | 8  | <i>Enterococcus faecium</i> ATCC 49624                          | -       | +       | -       |
|                          | 9  | <i>Yersinia enterocolitica</i> subsp. enterocolitica ATCC 27729 | -       | -       | -       |
|                          | 10 | <i>Shigella sonnei</i> ATCC 9290                                | -       | -       | -       |
|                          | 11 | <i>Lactobacillus salivarius</i> subsp. salivarius ATCC 11741    | -       | +       | -       |
|                          | 12 | <i>Enterobacter aerogenes</i> ATCC 13048                        | -       | -       | -       |
|                          | 13 | <i>Klebsiella pneumoniae</i> ATCC 13883                         | -       | -       | -       |
|                          | 14 | <i>Pseudomonas aeruginosa</i> ATCC 27853                        | -       | +       | -       |
|                          | 15 | <i>Candida albicans</i> (Robin) Berkhout ATCC 10231             | -       | -       | -       |
|                          | 16 | <i>Salmonella enterica</i>                                      | -       | +       | -       |
|                          | 17 | <i>Paenibacillus lautus</i>                                     | -       | +       | -       |
|                          | 18 | <i>Brevibacillus laterosporus</i>                               | -       | +       | -       |
| BCC                      | 19 | <i>Burkholderia cepacia</i> PC783                               | +       | +       | +       |
|                          | 20 | <i>Burkholderia cepacia</i> AU24442                             | +       | +       | +       |
|                          | 21 | <i>Burkholderia stabilis</i> AU23340                            | +       | +       | +       |
|                          | 22 | <i>Burkholderia pyrrocinia</i> AU11057                          | +       | +       | +       |
|                          | 23 | <i>Burkholderia ambifaria</i> HI2468                            | +       | +       | +       |
|                          | 24 | <i>Burkholderia anthina</i> HI2738                              | +       | +       | +       |
|                          | 25 | <i>Burkholderia metallica</i> AU0553                            | +       | +       | +       |
|                          | 26 | <i>Burkholderia metallica</i> AU16697                           | +       | +       | +       |
|                          | 27 | <i>Burkholderia contaminans</i> HI3429                          | +       | +       | +       |
|                          | 28 | <i>Burkholderia contaminans</i> AU24637                         | +       | +       | +       |
|                          | 29 | <i>Burkholderia diffusa</i> AU1075                              | +       | +       | +       |
|                          | 30 | <i>Burkholderia arboris</i> ES0263a                             | +       | +       | +       |
|                          | 31 | <i>Burkholderia arboris</i> AU22095                             | +       | +       | +       |
|                          | 32 | <i>Burkholderia lata</i> HI4002                                 | +       | +       | +       |
|                          | 33 | <i>Burkholderia cenocepacia</i> AU1054                          | +       | +       | +       |
|                          | 34 | <i>Burkholderia cenocepacia</i> AU0222                          | +       | +       | +       |
|                          | 35 | <i>Burkholderia cenocepacia</i> AU19236                         | +       | +       | +       |
|                          | 36 | <i>Burkholderia cenocepacia</i> HI2976                          | +       | +       | +       |
|                          | 37 | <i>Burkholderia cenocepacia</i> HI2485                          | +       | +       | +       |
|                          | 38 | <i>Burkholderia cenocepacia</i> J2315                           | +       | +       | +       |
| Non-BCC                  | 39 | <i>Burkholderia concitans</i> AU12121                           | -       | -       | +       |
|                          | 40 | <i>Burkholderia fungorum</i> AU18377                            | -       | +       | +-      |
|                          | 41 | <i>Burkholderia fungorum</i> AU35949                            | -       | +       | -       |
|                          | 42 | <i>Burkholderia gladioli</i> AU16341                            | -       | -       | -       |
|                          | 43 | <i>Burkholderia gladioli</i> AU26454                            | -       | -       | +-      |
|                          | 44 | <i>Burkholderia gladioli</i> AU29541                            | -       | -       | -       |
|                          | 45 | <i>Burkholderia gladioli</i> AU30473                            | -       | -       | +-      |
|                          | 46 | <i>Burkholderia glumae</i> AU6208                               | -       | -       | -       |
|                          | 47 | <i>Burkholderia glumae</i> AU12450                              | -       | +       | -       |
|                          | 48 | <i>Burkholderia oklahomensis</i> ES0634                         | -       | -       | -       |
|                          | 49 | <i>Burkholderia plantarii</i> AU9801                            | -       | -       | -       |
|                          | 50 | <i>Burkholderia plantarii</i> AU37486                           | -       | +       | -       |
|                          | 51 | <i>Burkholderia thailandensis</i> AU13555                       | -       | +       | -       |
|                          | 52 | <i>Burkholderia thailandensis</i> AU36262                       | -       | +       | -       |
|                          | 53 | <i>Burkholderia tropica</i> AU15822                             | -       | -       | -       |
|                          | 54 | <i>Burkholderia tropica</i> AU19944                             | -       | +       | +       |
|                          | 55 | <i>Caballeronia zhejiangensis</i> AU10475                       | -       | -       | -       |
|                          | 56 | <i>Caballeronia zhejiangensis</i> AU12096                       | -       | -       | +       |

Table S3. Comparison of positive results for *B. cepacia* complex using LAMP and qPCR in nuclease-free water.

|                                            | Inoculum (CFU/ml)                |                                 |                                 |                                 |                                 |                                 |                                 |                                 |
|--------------------------------------------|----------------------------------|---------------------------------|---------------------------------|---------------------------------|---------------------------------|---------------------------------|---------------------------------|---------------------------------|
|                                            | 10                               |                                 | 10 <sup>2</sup>                 |                                 | 10 <sup>3</sup>                 |                                 | 10 <sup>4</sup>                 |                                 |
|                                            | LAMP                             | qPCR                            | LAMP                            | qPCR                            | LAMP                            | qPCR                            | LAMP                            | qPCR                            |
| 1 <i>Burkholderia cepacia</i> PC783        | 2/6 <sup>a</sup>                 | 0/6                             | 2/6                             | 1/6                             | 2/6                             | 2/6                             | 0/6                             | 3/6                             |
| 2 <i>Burkholderia cepacia</i> AU24442      | 5/6                              | 1/6                             | 0/6                             | 2/6                             | 2/6                             | 3/6                             | 3/6                             | 3/6                             |
| 3 <i>Burkholderia stabilis</i> AU23340     | 2/6                              | 3/6                             | 1/6                             | 3/6                             | 2/6                             | 4/6                             | 2/6                             | 6/6                             |
| 4 <i>Burkholderia pyrrocinia</i> AU11057   | 1/6                              | 1/6                             | 1/6                             | 1/6                             | 1/6                             | 4/6                             | 1/6                             | 6/6                             |
| 5 <i>Burkholderia ambifaria</i> HI2468     | 2/6                              | 0/6                             | 1/6                             | 4/6                             | 3/6                             | 6/6                             | 3/6                             | 6/6                             |
| 6 <i>Burkholderia anthina</i> HI2738       | 2/6                              | 2/6                             | 3/6                             | 2/6                             | 2/6                             | 3/6                             | 2/6                             | 6/6                             |
| 7 <i>Burkholderia metallica</i> AU0553     | 6/6                              | 4/6                             | 6/6                             | 6/6                             | 5/6                             | 6/6                             | 6/6                             | 6/6                             |
| 8 <i>Burkholderia metallica</i> AU16697    | 5/6                              | 5/6                             | 6/6                             | 6/6                             | 3/6                             | 4/6                             | 6/6                             | 6/6                             |
| 9 <i>Burkholderia contaminans</i> HI3429   | 6/6                              | 0/6                             | 5/6                             | 4/6                             | 5/6                             | 3/6                             | 6/6                             | 5/6                             |
| 10 <i>Burkholderia contaminans</i> AU24637 | 5/6                              | 0/6                             | 6/6                             | 1/6                             | 6/6                             | 6/6                             | 6/6                             | 6/6                             |
| 11 <i>Burkholderia diffusa</i> AU1075      | 6/6                              | 1/6                             | 4/6                             | 3/6                             | 5/6                             | 5/6                             | 6/6                             | 6/6                             |
| 12 <i>Burkholderia arboris</i> ES0263a     | 6/6                              | 0/6                             | 3/6                             | 0/6                             | 5/6                             | 0/6                             | 6/6                             | 6/6                             |
| 13 <i>Burkholderia arboris</i> AU22095     | 3/6                              | 1/6                             | 3/6                             | 1/6                             | 4/6                             | 5/6                             | 6/6                             | 5/6                             |
| 14 <i>Burkholderia lata</i> HI4002         | 2/6                              | 1/6                             | 5/6                             | 2/6                             | 5/6                             | 5/6                             | 4/6                             | 6/6                             |
| 15 <i>Burkholderia cenocepacia</i> AU1054  | 4/6                              | 2/6                             | 3/6                             | 3/6                             | 3/6                             | 4/6                             | 6/6                             | 6/6                             |
| 16 <i>Burkholderia cenocepacia</i> AU0222  | 3/6                              | 3/6                             | 3/6                             | 3/6                             | 5/6                             | 3/6                             | 4/6                             | 6/6                             |
| 17 <i>Burkholderia cenocepacia</i> AU19236 | 2/6                              | 0/6                             | 2/6                             | 2/6                             | 4/6                             | 0/6                             | 5/6                             | 0/6                             |
| 18 <i>Burkholderia cenocepacia</i> HI2976  | 3/6                              | 0/6                             | 3/6                             | 2/6                             | 4/6                             | 4/6                             | 4/6                             | 2/6                             |
| 19 <i>Burkholderia cenocepacia</i> HI2485  | 2/6                              | 0/6                             | 2/6                             | 2/6                             | 5/6                             | 3/6                             | 4/6                             | 1/6                             |
| 20 <i>Burkholderia cenocepacia</i> J2315   | 3/6                              | 1/6                             | 3/6                             | 4/6                             | 4/6                             | 2/6                             | 4/6                             | 6/6                             |
| <b>Total</b>                               | <b>70/120*</b><br><b>(58.3%)</b> | <b>25/120</b><br><b>(20.8%)</b> | <b>62/120</b><br><b>(51.7%)</b> | <b>52/120</b><br><b>(43.3%)</b> | <b>75/120</b><br><b>(62.5%)</b> | <b>72/120</b><br><b>(60.0%)</b> | <b>84/120</b><br><b>(70.0%)</b> | <b>97/120</b><br><b>(80.8%)</b> |

<sup>a</sup>Number of positive/number of tests

\*There is a statistically significant difference between the qPCR and LAMP methods ( $p < 0.05$ ).

Table S4. Comparison of positive results for *B. cepacia* complex using LAMP and qPCR in CHX.

|                                            | Inoculum (CFU/ml)                |                                |                                  |                               |                                  |                                 |                                  |                                 |
|--------------------------------------------|----------------------------------|--------------------------------|----------------------------------|-------------------------------|----------------------------------|---------------------------------|----------------------------------|---------------------------------|
|                                            | 10                               |                                | 10 <sup>2</sup>                  |                               | 10 <sup>3</sup>                  |                                 | 10 <sup>4</sup>                  |                                 |
|                                            | LAMP                             | qPCR                           | LAMP                             | qPCR                          | LAMP                             | qPCR                            | LAMP                             | qPCR                            |
| 1 <i>Burkholderia cepacia</i> PC783        | 0/6 <sup>a</sup>                 | 0/6                            | 1/6                              | 0/6                           | 5/6                              | 0/6                             | 5/6                              | 5/6                             |
| 2 <i>Burkholderia cepacia</i> AU24442      | 2/6                              | 0/6                            | 0/6                              | 0/6                           | 2/6                              | 0/6                             | 4/6                              | 3/6                             |
| 3 <i>Burkholderia stabilis</i> AU23340     | 1/6                              | 0/6                            | 1/6                              | 2/6                           | 0/6                              | 2/6                             | 1/6                              | 5/6                             |
| 4 <i>Burkholderia pyrrocinia</i> AU11057   | 0/6                              | 0/6                            | 0/6                              | 2/6                           | 0/6                              | 3/6                             | 3/6                              | 4/6                             |
| 5 <i>Burkholderia ambifaria</i> HI2468     | 1/6                              | 0/6                            | 0/6                              | 0/6                           | 0/6                              | 3/6                             | 0/6                              | 5/6                             |
| 6 <i>Burkholderia anthina</i> HI2738       | 1/6                              | 0/6                            | 2/6                              | 0/6                           | 0/6                              | 3/6                             | 1/6                              | 3/6                             |
| 7 <i>Burkholderia metallica</i> AU0553     | 0/6                              | 0/6                            | 2/6                              | 0/6                           | 3/6                              | 3/6                             | 4/6                              | 5/6                             |
| 8 <i>Burkholderia metallica</i> AU16697    | 5/6                              | 0/6                            | 5/6                              | 0/6                           | 4/6                              | 0/6                             | 4/6                              | 5/6                             |
| 9 <i>Burkholderia contaminans</i> HI3429   | 0/6                              | 0/6                            | 1/6                              | 0/6                           | 4/6                              | 0/6                             | 4/6                              | 6/6                             |
| 10 <i>Burkholderia contaminans</i> AU24637 | 1/6                              | 0/6                            | 2/6                              | 0/6                           | 4/6                              | 1/6                             | 5/6                              | 6/6                             |
| 11 <i>Burkholderia diffusa</i> AU1075      | 2/6                              | 1/6                            | 2/6                              | 0/6                           | 3/6                              | 0/6                             | 2/6                              | 1/6                             |
| 12 <i>Burkholderia arboris</i> ES0263a     | 3/6                              | 0/6                            | 1/6                              | 0/6                           | 2/6                              | 0/6                             | 2/6                              | 2/6                             |
| 13 <i>Burkholderia arboris</i> AU22095     | 1/6                              | 0/6                            | 1/6                              | 0/6                           | 4/6                              | 1/6                             | 0/6                              | 6/6                             |
| 14 <i>Burkholderia lata</i> HI4002         | 2/6                              | 0/6                            | 2/6                              | 0/6                           | 2/6                              | 0/6                             | 1/6                              | 5/6                             |
| 15 <i>Burkholderia cenocepacia</i> AU1054  | 5/6                              | 0/6                            | 1/6                              | 0/6                           | 4/6                              | 0/6                             | 2/6                              | 4/6                             |
| 16 <i>Burkholderia cenocepacia</i> AU0222  | 2/6                              | 0/6                            | 4/6                              | 0/6                           | 2/6                              | 0/6                             | 4/6                              | 6/6                             |
| 17 <i>Burkholderia cenocepacia</i> AU19236 | 0/6                              | 0/6                            | 0/6                              | 0/6                           | 0/6                              | 0/6                             | 2/6                              | 5/6                             |
| 18 <i>Burkholderia cenocepacia</i> HI2976  | 0/6                              | 0/6                            | 0/6                              | 0/6                           | 0/6                              | 1/6                             | 0/6                              | 6/6                             |
| 19 <i>Burkholderia cenocepacia</i> HI2485  | 1/6                              | 0/6                            | 0/6                              | 0/6                           | 0/6                              | 0/6                             | 1/6                              | 6/6                             |
| 20 <i>Burkholderia cenocepacia</i> J2315   | 2/6                              | 0/6                            | 1/6                              | 0/6                           | 0/6                              | 2/6                             | 4/6                              | 2/6                             |
| <b>Total</b>                               | <b>29/120*</b><br><b>(24.2%)</b> | <b>1/120</b><br><b>(0.83%)</b> | <b>26/120*</b><br><b>(21.7%)</b> | <b>4/120</b><br><b>(3.3%)</b> | <b>39/120*</b><br><b>(32.5%)</b> | <b>19/120</b><br><b>(15.8%)</b> | <b>49/120*</b><br><b>(40.8%)</b> | <b>90/120</b><br><b>(75.0%)</b> |

<sup>a</sup>Number of positive/number of tests\*There is a statistically significant difference between the qPCR and LAMP methods ( $p < 0.05$ ).

Table S5. Comparison of positive results for *B. cepacia* complex using LAMP and qPCR in BZK.

|                                            | Inoculum (CFU/ml)                |                               |                                  |                                 |                                  |                                 |                                  |                                 |
|--------------------------------------------|----------------------------------|-------------------------------|----------------------------------|---------------------------------|----------------------------------|---------------------------------|----------------------------------|---------------------------------|
|                                            | 10                               |                               | 10 <sup>2</sup>                  |                                 | 10 <sup>3</sup>                  |                                 | 10 <sup>4</sup>                  |                                 |
|                                            | LAMP                             | qPCR                          | LAMP                             | qPCR                            | LAMP                             | qPCR                            | LAMP                             | qPCR                            |
| 1 <i>Burkholderia cepacia</i> PC783        | 0/6 <sup>a</sup>                 | 0/6                           | 0/6                              | 0/6                             | 2/6                              | 4/6                             | 4/6                              | 0/6                             |
| 2 <i>Burkholderia cepacia</i> AU24442      | 1/6                              | 0/6                           | 4/6                              | 4/6                             | 4/6                              | 6/6                             | 5/6                              | 6/6                             |
| 3 <i>Burkholderia stabilis</i> AU23340     | 3/6                              | 0/6                           | 3/6                              | 3/6                             | 2/6                              | 4/6                             | 4/6                              | 3/6                             |
| 4 <i>Burkholderia pyrrocinia</i> AU11057   | 2/6                              | 0/6                           | 3/6                              | 0/6                             | 2/6                              | 2/6                             | 5/6                              | 1/6                             |
| 5 <i>Burkholderia ambifaria</i> HI2468     | 3/6                              | 0/6                           | 1/6                              | 0/6                             | 3/6                              | 4/6                             | 2/6                              | 4/6                             |
| 6 <i>Burkholderia anthina</i> HI2738       | 2/6                              | 0/6                           | 3/6                              | 3/6                             | 4/6                              | 6/6                             | 4/6                              | 6/6                             |
| 7 <i>Burkholderia metallica</i> AU0553     | 2/6                              | 0/6                           | 2/6                              | 4/6                             | 6/6                              | 6/6                             | 4/6                              | 6/6                             |
| 8 <i>Burkholderia metallica</i> AU16697    | 5/6                              | 0/6                           | 5/6                              | 2/6                             | 6/6                              | 6/6                             | 5/6                              | 6/6                             |
| 9 <i>Burkholderia contaminans</i> HI3429   | 0/6                              | 0/6                           | 1/6                              | 4/6                             | 4/6                              | 6/6                             | 6/6                              | 6/6                             |
| 10 <i>Burkholderia contaminans</i> AU24637 | 0/6                              | 0/6                           | 1/6                              | 0/6                             | 4/6                              | 4/6                             | 6/6                              | 6/6                             |
| 11 <i>Burkholderia diffusa</i> AU1075      | 1/6                              | 0/6                           | 3/6                              | 0/6                             | 2/6                              | 5/6                             | 4/6                              | 6/6                             |
| 12 <i>Burkholderia arboris</i> ES0263a     | 2/6                              | 0/6                           | 1/6                              | 1/6                             | 2/6                              | 4/6                             | 4/6                              | 6/6                             |
| 13 <i>Burkholderia arboris</i> AU22095     | 2/6                              | 0/6                           | 1/6                              | 0/6                             | 2/6                              | 6/6                             | 3/6                              | 6/6                             |
| 14 <i>Burkholderia lata</i> HI4002         | 2/6                              | 0/6                           | 1/6                              | 0/6                             | 1/6                              | 2/6                             | 1/6                              | 3/6                             |
| 15 <i>Burkholderia cenocepacia</i> AU1054  | 2/6                              | 0/6                           | 2/6                              | 0/6                             | 1/6                              | 3/6                             | 0/6                              | 4/6                             |
| 16 <i>Burkholderia cenocepacia</i> AU0222  | 4/6                              | 0/6                           | 1/6                              | 0/6                             | 2/6                              | 2/6                             | 5/6                              | 5/6                             |
| 17 <i>Burkholderia cenocepacia</i> AU19236 | 2/6                              | 0/6                           | 2/6                              | 0/6                             | 2/6                              | 5/6                             | 2/6                              | 4/6                             |
| 18 <i>Burkholderia cenocepacia</i> HI2976  | 1/6                              | 0/6                           | 3/6                              | 0/6                             | 2/6                              | 6/6                             | 4/6                              | 4/6                             |
| 19 <i>Burkholderia cenocepacia</i> HI2485  | 5/6                              | 0/6                           | 4/6                              | 3/6                             | 2/6                              | 4/6                             | 1/6                              | 6/6                             |
| 20 <i>Burkholderia cenocepacia</i> J2315   | 3/6                              | 0/6                           | 4/6                              | 2/6                             | 4/6                              | 6/6                             | 0/6                              | 6/6                             |
| <b>Total</b>                               | <b>42/120*</b><br><b>(35.0%)</b> | <b>0/120</b><br><b>(0.0%)</b> | <b>45/120*</b><br><b>(37.5%)</b> | <b>26/120</b><br><b>(21.7%)</b> | <b>57/120*</b><br><b>(47.5%)</b> | <b>91/120</b><br><b>(75.8%)</b> | <b>69/120*</b><br><b>(57.5%)</b> | <b>94/120</b><br><b>(78.3%)</b> |

<sup>a</sup>Number of positive/number of tests\*There is a statistically significant difference between the qPCR and LAMP methods ( $p < 0.05$ ).

Figure S1. Venn diagram for the clusters of BCC group and non-BCC group. Among 174,715 orthologous gene clusters (with  $\geq 75\%$  sequence identity) observed across all 266 complete *Burkholderia* genomes, 206 BCC-specific gene clusters were identified (a) and work flow of primer design process (b).

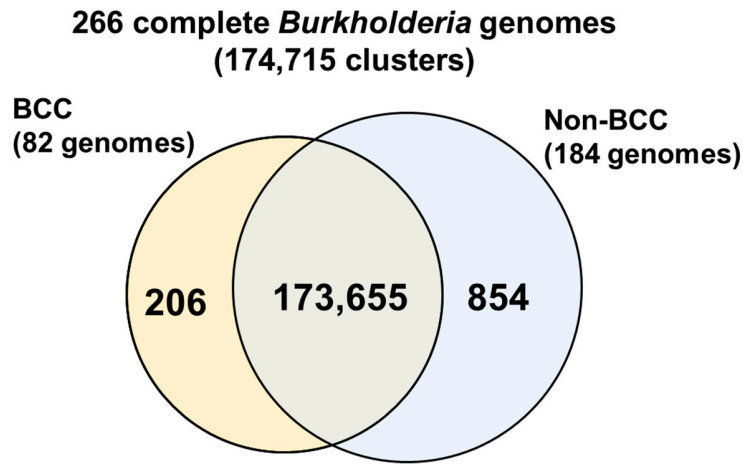

(a)

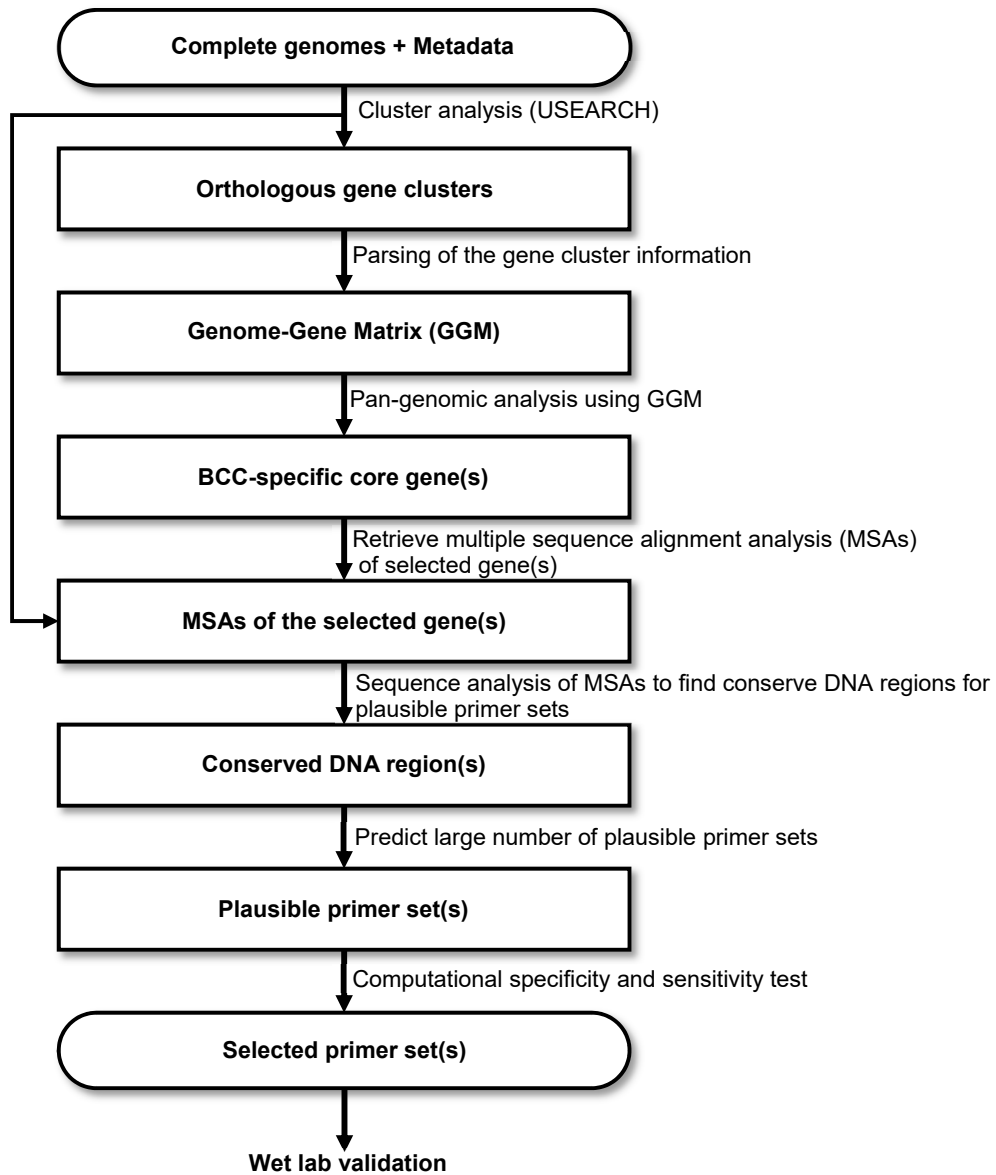

(b)

Figure S2. Different reaction volume conditions (5, 10, 15, and 20  $\mu$ l) of LAMP assay using 10.3  $\mu$ g/ml and 1.03  $\mu$ g/ml of *B. cenocepacia* AU1054 at 65°C. Colorimetric LAMP for the detection of BCC using RibB 16 primer.

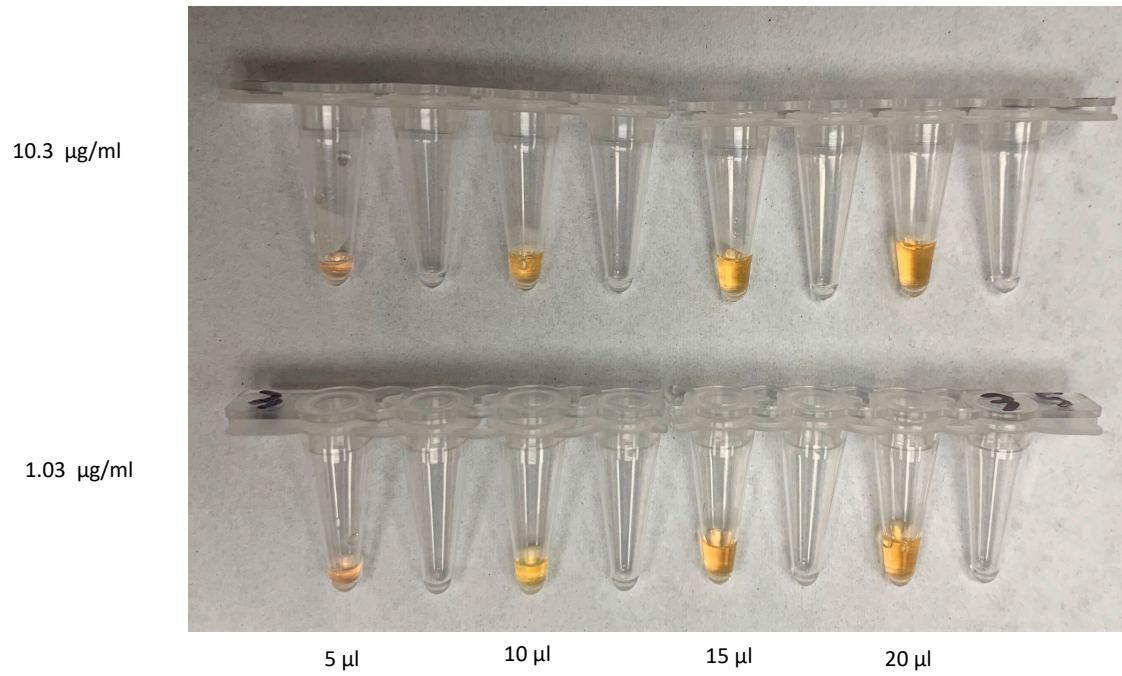

Supplement: s1 [file s1]
